# Supplementary material for: Cleavage of cFLIP restrains cell death during viral infection and tissue injury and favors tissue repair
Source: PubMed Central journal article supplement (PMC10371024; doi:10.1126/sciadv.adg2829), 2023-07-26
Supplement: sciadv.adg2829_sm.pdf [file sciadv.adg2829_sm.pdf]

Supplementary Materials for  
**Cleavage of cFLIP restrains cell death during viral infection and tissue injury  
and favors tissue repair**

Kristel Martinez Lagunas *et al.*

Corresponding author: Alessandro Annibaldi, [a.annibaldi@uni-koeln.de](mailto:a.annibaldi@uni-koeln.de)

*Sci. Adv.* **9**, eadg2829 (2023)  
DOI: 10.1126/sciadv.adg2829

**This PDF file includes:**

Figs. S1 to S6

Supplementary figure 1

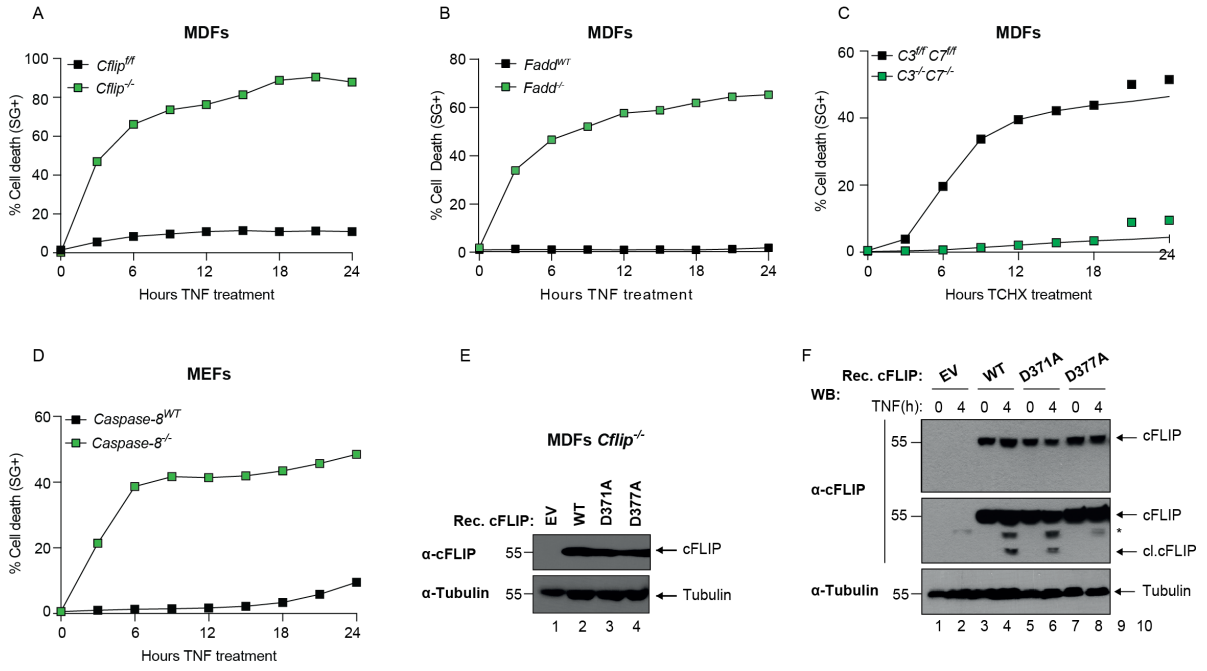

**Supplementary Fig. 1. cFLIP is cleaved at Asp377 following TNFR1 activation.** (A) *Cflip<sup>ff</sup>* and *Cflip<sup>-/-</sup>* and (B) *Fadd<sup>WT</sup>* and *Fadd<sup>-/-</sup>* were treated with TNF (100 ng/ml), (C) *Caspase3<sup>ff</sup>/Caspase7<sup>ff</sup>* and *Caspase-3<sup>-/-</sup>Caspase7<sup>-/-</sup>* MDFs were treated with TNF (100 ng/ml) and cycloheximide (1  $\mu$ g/ml), (D) *Caspase-8<sup>WT</sup>* and *Caspase-8<sup>-/-</sup>* MEFs were treated with TNF (100 ng/ml) and cell death was measured over time by calculating the percentage of Sytox Green positive cells. (E) Lysates of *Cflip<sup>-/-</sup>* MDFs, reconstituted as shown in the figure, were immunoblotted with the indicated specific antibodies (EV: empty vector). (F) *Cflip<sup>-/-</sup>* MDFs, reconstituted as in E were treated with TNF (10 ng/ml) and cell lysates were analyzed by immunoblotting with the indicated specific antibodies (n=2). The asterisk (\*) indicates a non-specific band. (G) Cells as in E were treated with TNF (10 ng/ml) and cell death was measured over time by calculating the percentage of Sytox Green positive cells (graphic representative of two different experiments).

Supplementary figure 2

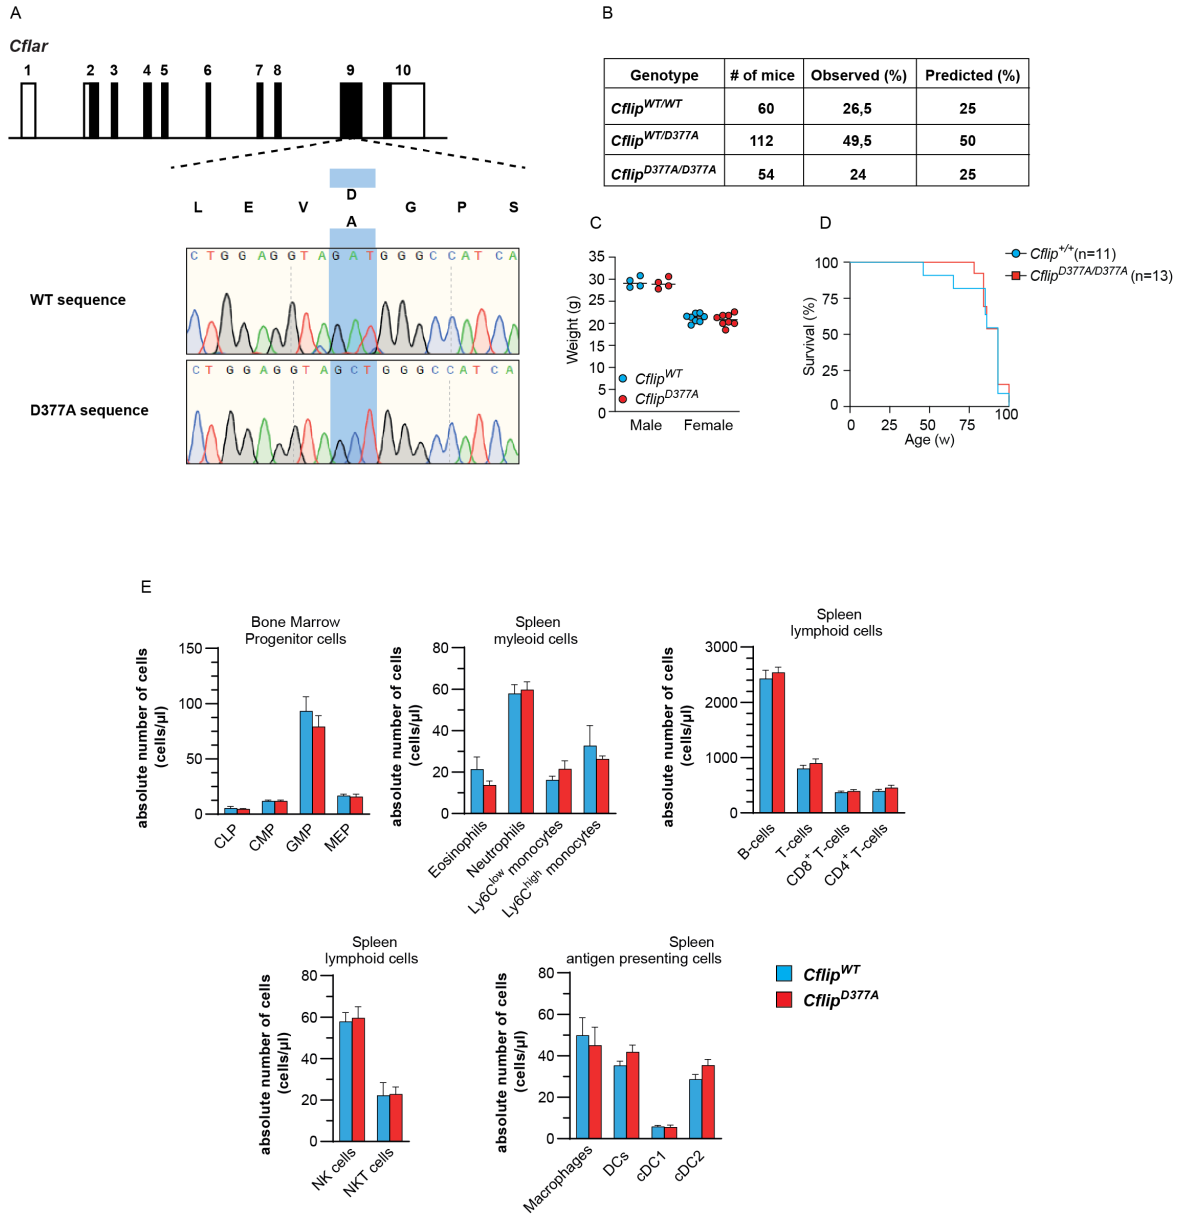

**Supplementary Fig. 2. cFLIP is cleaved at Asp377 following TNFR1 activation.** (A) Cartoon depicting the *Cflar* exons (upper part). DNA sequence alignment of the region bearing the D>A mutation (lower part). (B) Observed and expected numbers of mice of the indicated genotypes from *Cflip*<sup>WT/D377A</sup> intercrosses. (C) Weight of 12 weeks old *Cflip*<sup>WT</sup> and *Cflip*<sup>D377A</sup> homozygous mice. (D) Aging curves of *Cflip*<sup>WT</sup> and *Cflip*<sup>D377A</sup> homozygous mice. (E) FACS analysis of hematopoietic cells isolated from spleen and bone marrow of *Cflip*<sup>WT</sup> and *Cflip*<sup>D377A</sup> homozygous mice (n=4 mice per genotype).

Supplementary figure 3

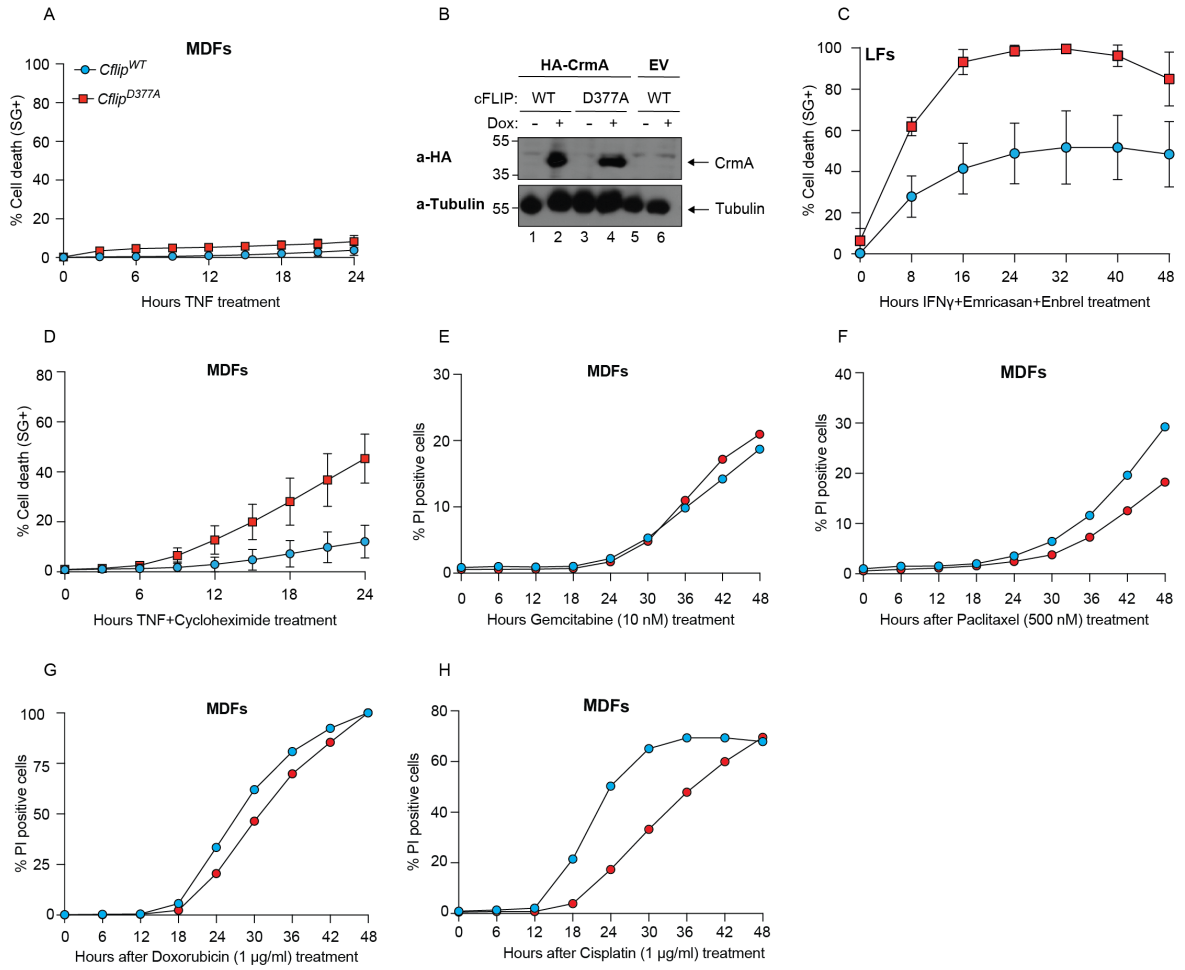

**Supplementary Fig. 3. Cleavage resistant cFLIP mutant sensitizes to TNF-induced necroptosis and apoptosis.** (A) *Cflip*<sup>WT</sup> and *Cflip*<sup>D377A</sup> MDFs were treated with TNF (100 ng/ml) and cell death was measured over time by calculating the percentage of Sytox Green positive cells. (B) MDFs cFLIP WT and D377A stably expressing a doxycycline-inducible HA-tagged CrmA construct and WT MDFs expressing an empty vector (EV) were treated for 72 hours with doxycycline (1 µg/ml). Cell lysates were then analysed by immunoblotting using an anti-HA specific antibody. (C) LFs were pre-treated with Enbrel (50 µg/ml) and IFN $\gamma$  before being subjected to emricasan (1 µM) treatment. Cell death was measured as in A. MDFs WT and D377A mutant were treated with TNF (10 ng/ml) and cycloheximide (1 µg/ml) (D), gemcitabine (10 nM) (E), paclitaxel (500 nM) (F), doxorubicin (1 µg/ml) (G) and cisplatin (1 µg/ml) (H), and cell death was measure as in A.

Supplementary figure 4

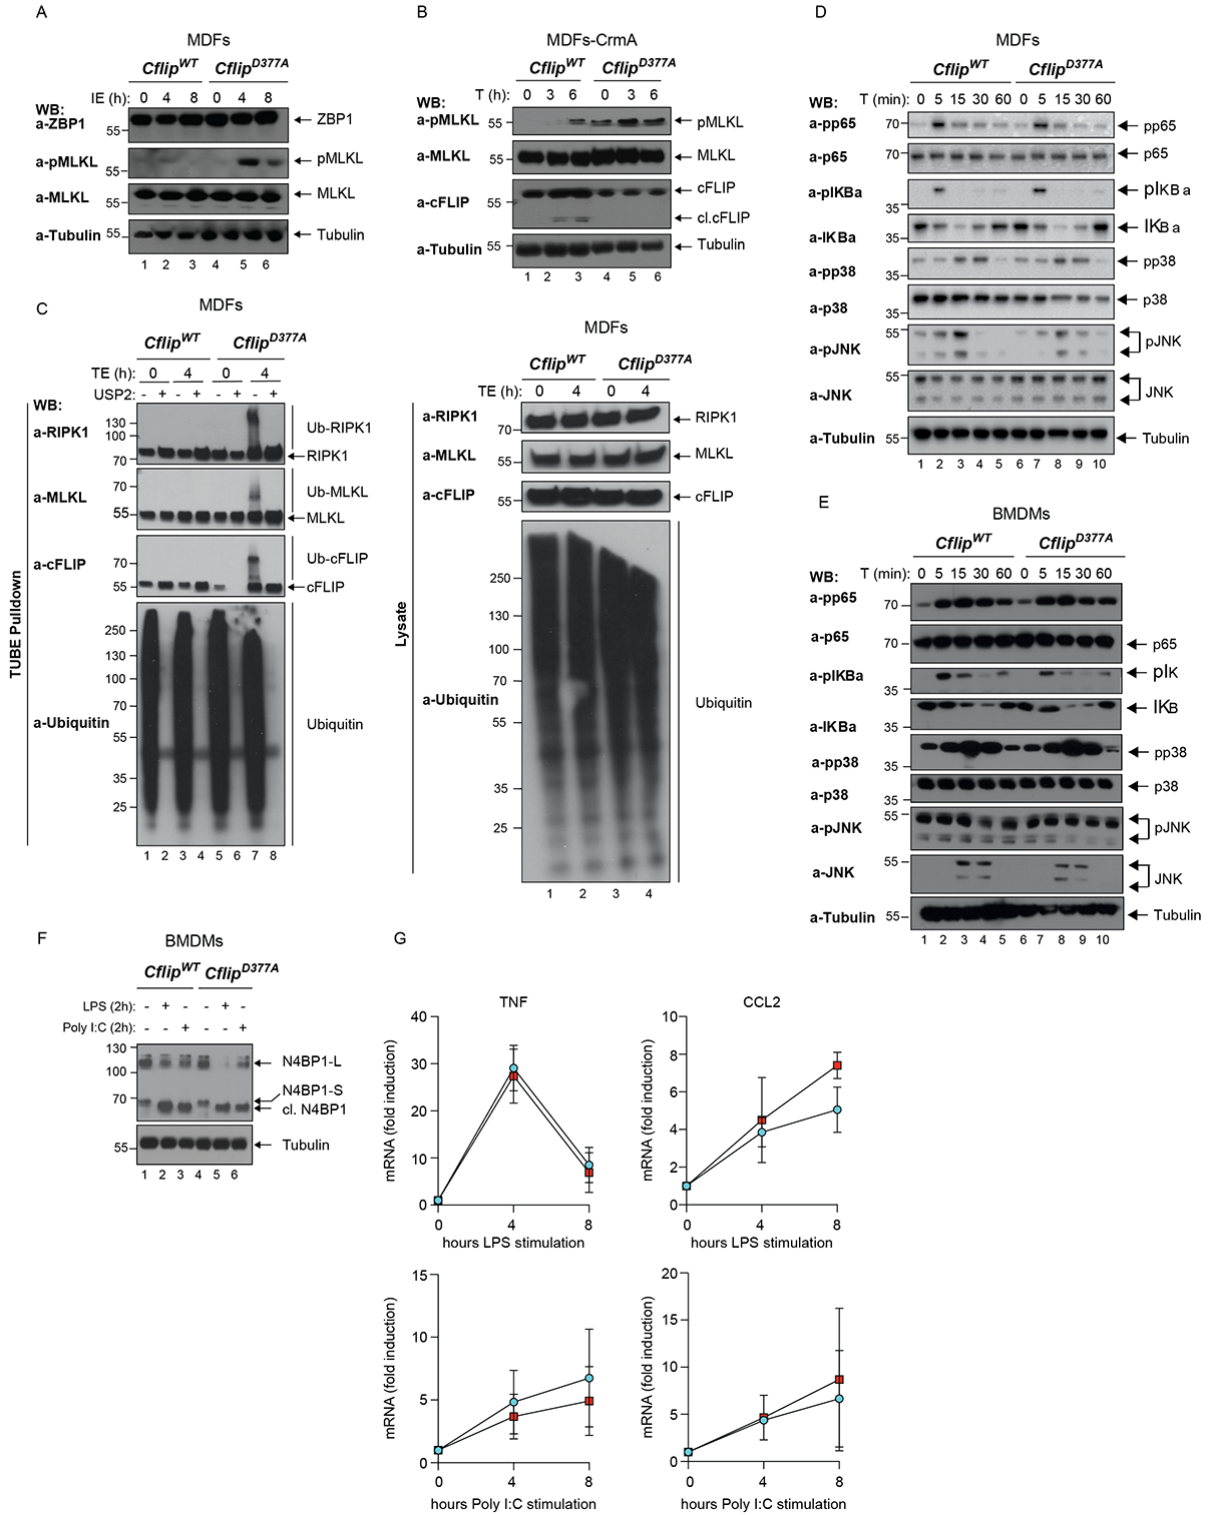



**Supplementary Fig. 4. cFLIP cleavage limits complex-II formation, independent of NF- $\kappa$ B.**

(A) WT and D377A-mutant MDFs were treated with IFN $\gamma$  (100 ng/ml) and emricasan (1  $\mu$ M) for the indicated time points and protein extracts were analyzed by immunoblotting with the indicated specific antibodies (n=2). (B) WT and D377A mutant MDFs stably expressing a doxycycline (dox)-inducible construct encoding for CrmA were treated for 72 hours with dox and then with TNF (T) (100 ng/ml) for the indicated time points. protein extracts were analyzed by immunoblotting with the indicated specific antibodies (n=3). (C) *Cflip*<sup>WT</sup> and *Cflip*<sup>D377A</sup> MDFs were treated with TNF (1 ng/ml) and emricasan (1  $\mu$ g/ml) for the indicated time points and protein lysates were subjected to TUBE pull-down. The pull-down fractions were left untreated or treated with the deubiquitinase USP2 and analysed by immunoblotting (n=3). (D) MDFs and (E) BMDMs were treated with TNF (100 ng/ml) for the indicated time points and protein extracts were analysed by immunoblotting with the indicated specific antibodies (n=2).



**Supplementary Fig. 5. cFLIP cleavage counteracts complex-II formation.** (A) WT MDFs were treated for 4 hours with TNF (10 ng/ml), Smac mimetic birinapant (250 nM) and emricasan (1 µg/ml) and lysates separated on a Superose 6 column. Aliquots from each fraction were retained and analyzed by immunoblotting with the indicated specific antibodies (1<sup>st</sup> step) or pooled as indicated and subjected to FADD immunoprecipitation (2<sup>nd</sup> step). Immunocomplexes were then analyzed by immunoblotting as indicated.

Supplementary figure 6

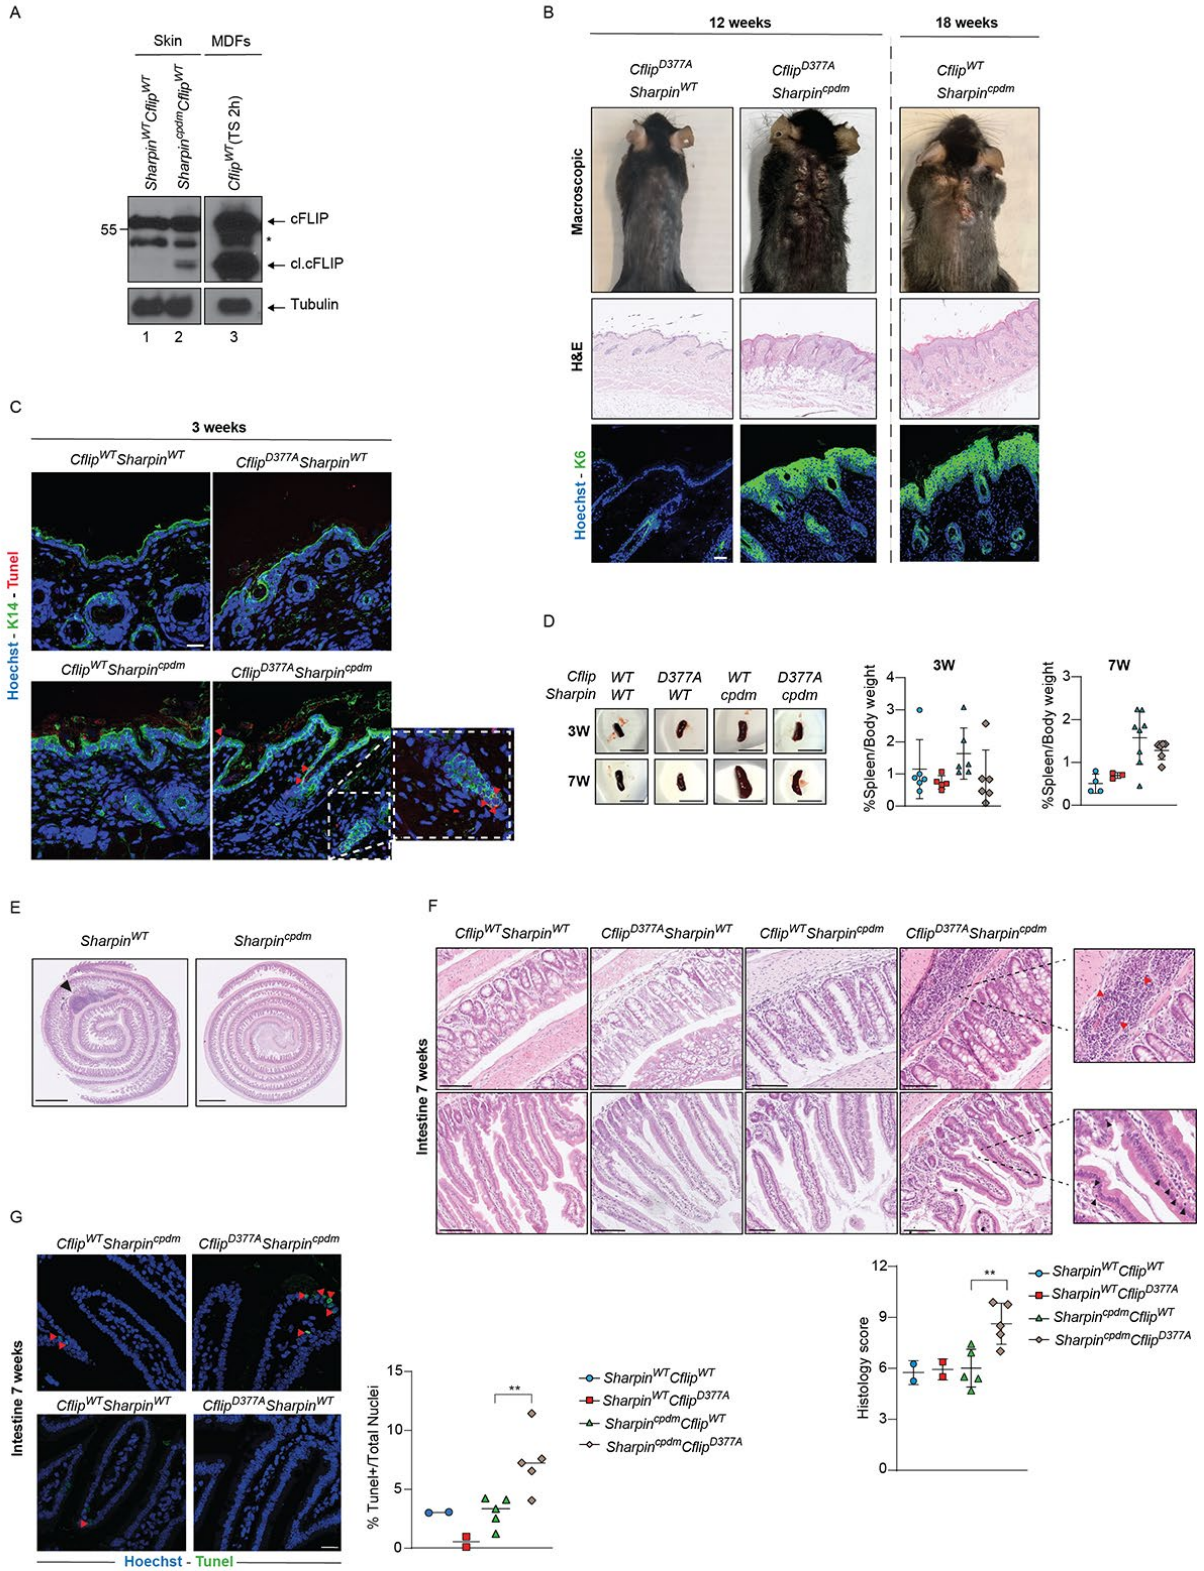

**Supplementary Fig. 6. Abrogation of cFLIP cleavage exacerbates the phenotype of *Sharpin* mutant mice.** (A) Skin lysates of 7 weeks old WT and *Sharpin<sup>cpdm</sup>* mice and lysate from WT MDFs treated for 2 hours with TS were immunoblotted for the indicated proteins. Right and left panel belong to the same film. (B) Representative pictures of mice and skin sections, stained with H&E and K6, of the indicated genotypes and age. (C) Representative pictures of skin sections, co-stained with K14 and TUNEL, of 3 weeks old mice of the indicated genotypes. (D) Spleen of 3 and 7 weeks old mice of the indicated genotypes (left), with the respective weight expressed as percentage of total body weight (right). (E) Small intestine sections of *Sharpin<sup>WT</sup>* and *Sharpin<sup>cpdm</sup>* mice. Arrowhead indicates a Peyer's patch. Scale bar 1 mm. (F) Large (top row) and small (lower row) intestine sections of 7 weeks old mice of the indicated genotypes with the histology score relative to the whole intestine. Each symbol represents one mouse. Data are presented as mean  $\pm$  SD, \*\* $p < 0,01$ . Scale bar 100 $\mu$ m. Red and dark arrowheads indicate areas of inflammation and dead cells, respectively. (G) TUNEL staining of small intestine sections of 7 weeks old mice of the indicated genotypes (left) with the relative quantification (right) expressed as percentage of TUNEL positive cells over the total number of cells. Scale bar 20  $\mu$ m. Red arrowheads indicate TUNEL positive cells. Data are presented as mean  $\pm$  SD, \* $p < 0,05$ .
